# Supplementary material
Source: Springer Nature journal article supplement (https://www.springermedizin.de/resource/supplementary/13098_2012_193_MOESM1_ESM.pdf/9670702)

**(A)**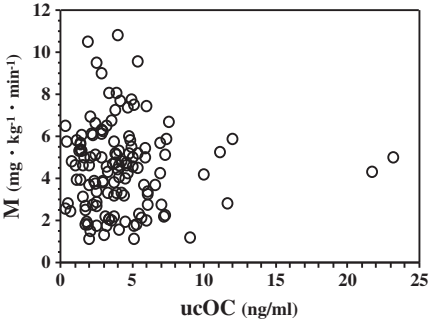**(B)**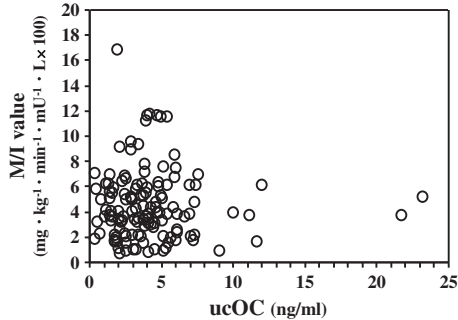

Supplement: MOESM1 [file 9670702]
